# Supplementary material for: MUC14-Related ncRNA-mRNA Network in Breast Cancer
Source: MDPI journal article supplement (doi:10.3390/genes12111677), 2021-10-23
Supplement: s1 [file s1]

**Table S1.** The expression differences of MUCs family among various major pathological stage in breast cancer using TCGA data.

| Gene name    | F-value      | P-value         |
|--------------|--------------|-----------------|
| MUC1         | 1.610        | 1.70E-01        |
| MUC3A        | 1.140        | 3.38E-01        |
| MUC4         | 0.637        | 6.36E-01        |
| MUC12        | 1.390        | 2.36E-01        |
| MUC13        | 0.603        | 6.61E-01        |
| MUC15        | 0.921        | 4.51E-01        |
| <b>MUC16</b> | <b>3.210</b> | <b>1.25E-02</b> |
| MUC17        | 0.980        | 4.17E-01        |
| MUC20        | 0.952        | 4.33E-01        |
| MUC21        | 0.361        | 8.37E-01        |
| MUC22        | 0.290        | 8.85E-01        |
| MUC2         | 0.323        | 8.63E-01        |
| MUC5AC       | 0.284        | 8.89E-01        |
| MUC5B        | 1.540        | 1.88E-01        |
| MUC6         | 0.997        | 4.08E-01        |
| MUC7         | 1.710        | 1.46E-01        |
| MUC9         | 0.101        | 9.82E-01        |
| MUC19        | 0.972        | 4.22E-01        |
| <b>MUC14</b> | <b>5.830</b> | <b>1.21E-04</b> |
| MUC18        | 0.269        | 8.98E-01        |
